# Supplementary material
Source: PubMed Central journal article supplement (PMC5473247)
Supplement: 10.1074_M117.778373_jbc.M117.778373-1.pdf [file 10.1074_M117.778373_jbc.M117.778373-1.pdf]

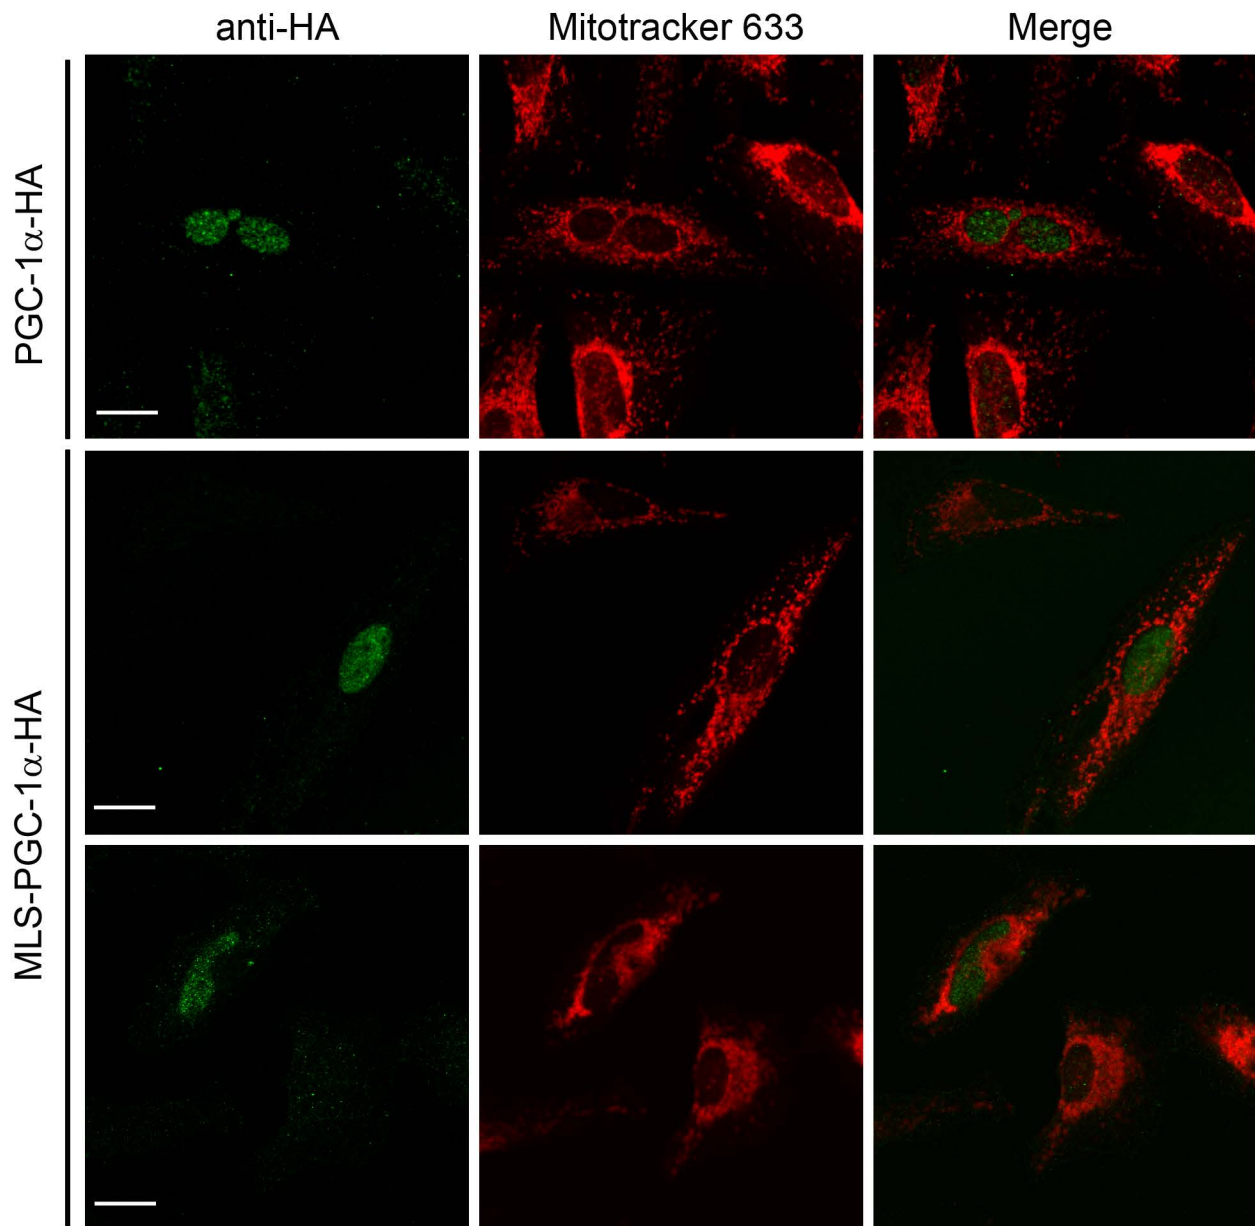

**Figure S1. MLS-PGC-1 $\alpha$  localizes in the nucleus.**

Cellular localization of PGC-1 $\alpha$  and MLS-PGC-1 $\alpha$ . HeLa cells were transfected with PGC-1 $\alpha$ -HA and MLS-PGC-1 $\alpha$ -HA using Fugene 6. Immunofluorescence was carried out using anti-HA antibody and mitotracker 633. Scale bar, 100  $\mu$ m.
